# Supplementary material
Source: MDPI journal article supplement (https://www.mdpi.com/2076-3417/8/5/762)
Supplement: s1 [file s1]

# Supplementary Materials: Application of [Pt(II)(Tetra-*Tert*-Butylsalophen)] Complex within Organic Devices: Deep Red Emission, Bistable Light-Emitting Diodes and Operational Stability

Benoît Blondel <sup>1,2</sup>, Anaïs Colin<sup>1</sup>, Manuel Lopes <sup>1</sup>, Fabienne Alary <sup>3</sup>, Georges Zissis <sup>1</sup>, Isabelle Sasaki <sup>2</sup> and Cédric Renaud <sup>1,\*</sup>

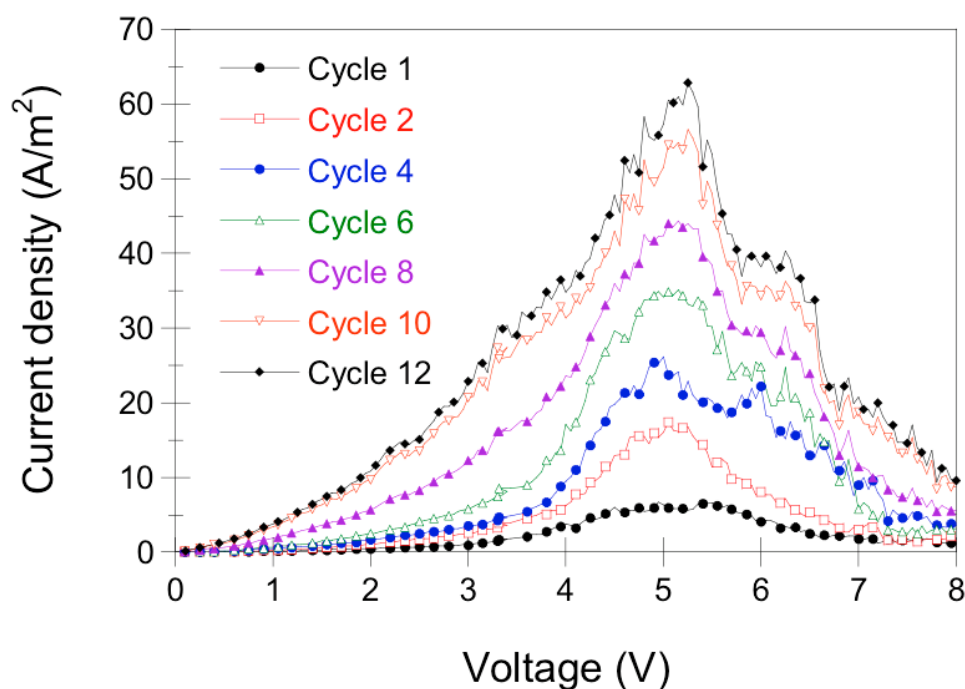

**Figure S1.** indicated the evolution of NDR peak after several positive sweeping cycles (from 0 to +14 V). Positive poling procedure consists in performing several sweeping voltage cycles from 0 to +14 V, till the intensity of the current peak tends to saturate.

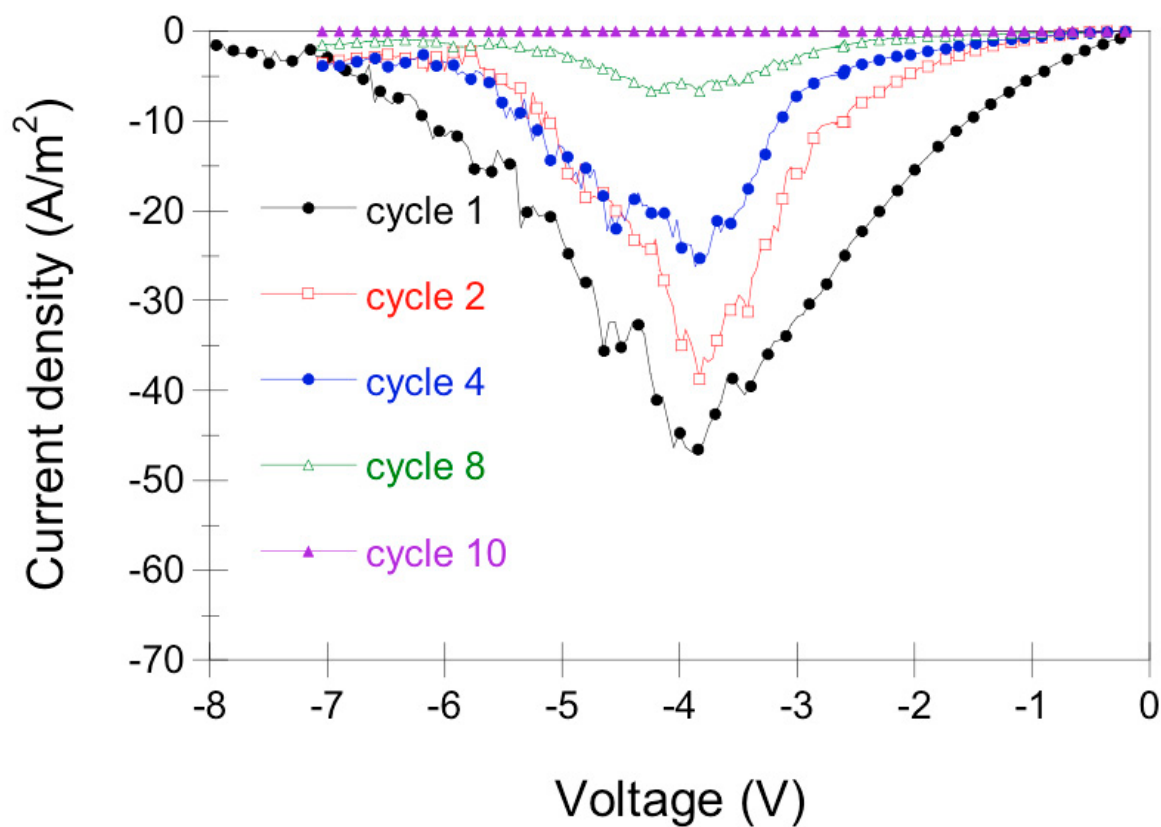

**Figure S2.** Evolution of NDR peak after several negative sweeping cycles (from 0 to  $-14$  V). Negative poling procedure consists in performing several sweeping voltage cycles from 0 to  $-14$  V, till the intensity of the current peak is lower than  $10 \text{ mA/m}^2$ .

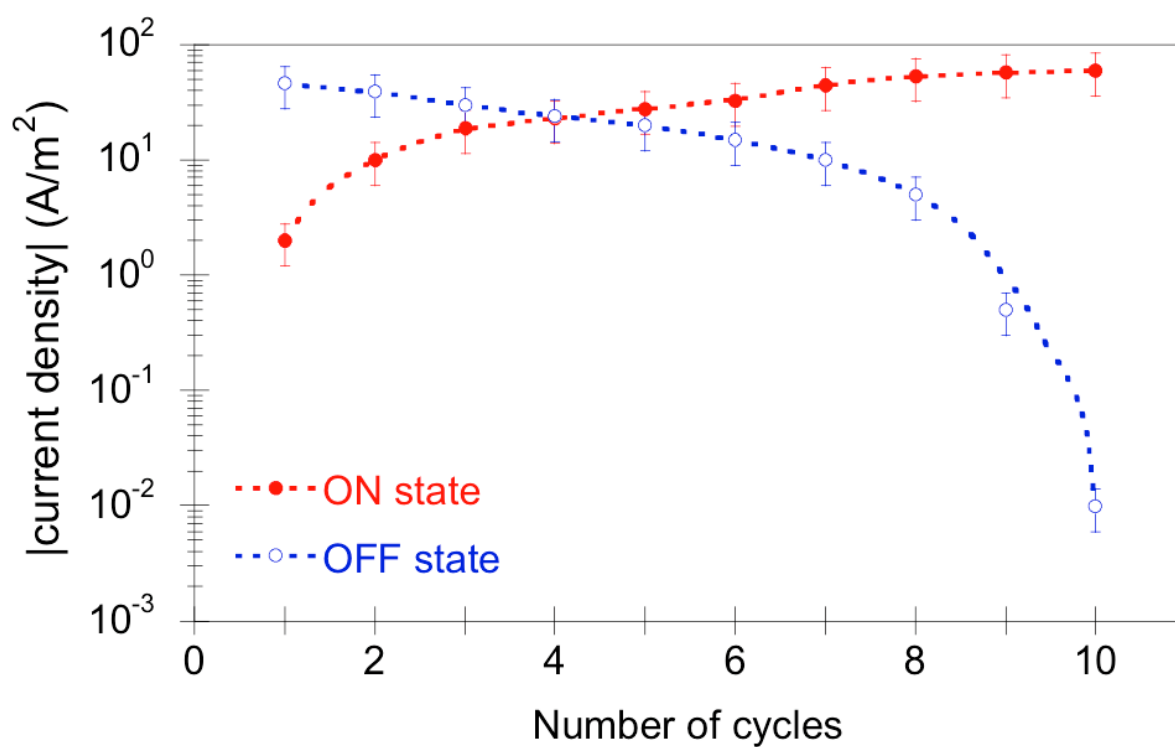

**Figure S3.** Variation of the current density (in ON and OFF state) versus the number of sweeping voltage cycles. The current density was measured for an applied voltage of  $\pm 5$  V.

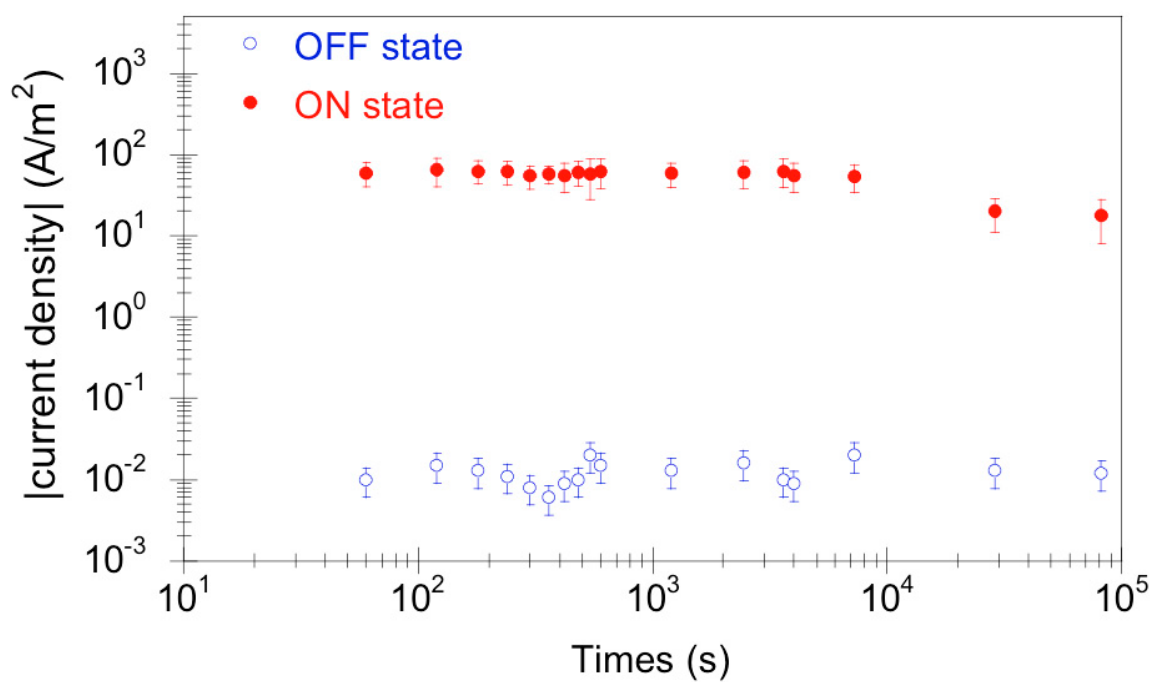

**Figure S4.** Retention time of both ON and OFF states measured at room temperature by applying constant voltage of 5 V. The current densities of both states ( $J_{\text{ON}}$  and  $J_{\text{OFF}}$ ) do not show significant degradation after  $10^4$  s.
